# Supplementary material
Source: Frontiers journal article supplement (https://www.frontiersin.org/articles/442782)

**Supplementary Figure S2:** Contingency analysis output files in JMP program for the sequence variants analyzed in this study. Each output file comprises a **Mosaic Plot**, a **Contingency Table**, and **Statistics Tests**; **N** - the total number of observations; **DF** - records the degrees of freedom associated with the test; **-LogLike** - negative log-likelihood; **Rsquare (U)** - shows portion of the total uncertainty attributed to the model fit. **ChiSquare** – two chi-square statistical tests; **Prob>ChiSq** - lists the probability of obtaining, by chance alone, a Chi-square value greater than the one computed if no relationship exists between phenotype and genotype.

# MC1R Promotor

g.535236C>T

## Contingency Analysis of Population Colors By Genotypes

### Mosaic Plot

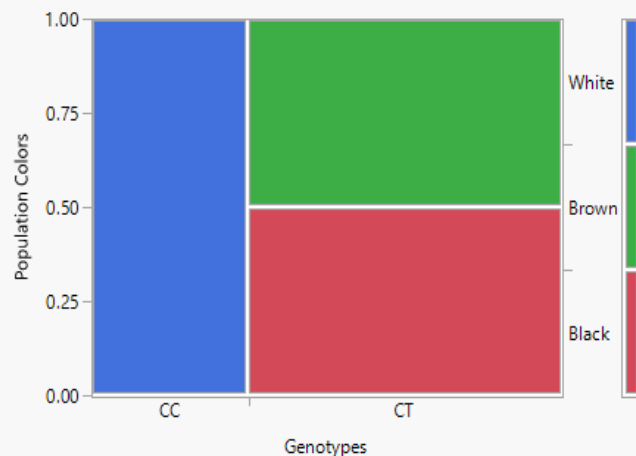

### Contingency Table

| Population Colors |       |        |        |        |       |
|-------------------|-------|--------|--------|--------|-------|
| Count             | Black | Brown  | White  | Total  |       |
| Total %           |       |        |        |        |       |
| Col %             |       |        |        |        |       |
| Row %             |       |        |        |        |       |
| Genotypes         | CC    | 0      | 0      | 4      | 4     |
|                   |       | 0.00   | 0.00   | 33.33  | 33.33 |
|                   |       | 0.00   | 0.00   | 100.00 |       |
|                   |       | 0.00   | 0.00   | 100.00 |       |
|                   |       |        |        |        |       |
| Genotypes         | CT    | 4      | 4      | 0      | 8     |
|                   |       | 33.33  | 33.33  | 0.00   | 66.67 |
|                   |       | 100.00 | 100.00 | 0.00   |       |
|                   |       | 50.00  | 50.00  | 0.00   |       |
|                   |       |        |        |        |       |
| Total             |       | 4      | 4      | 4      | 12    |
|                   |       | 33.33  | 33.33  | 33.33  |       |

### Tests

| N  | DF | -LogLike  | RSquare (U) |
|----|----|-----------|-------------|
| 12 | 2  | 7.6381700 | 0.5794      |

| Test             | ChiSquare | Prob>ChiSq |
|------------------|-----------|------------|
| Likelihood Ratio | 15.276    | 0.0005*    |
| Pearson          | 12.000    | 0.0025*    |

Warning: 20% of cells have expected count less than 5, ChiSquare suspect.

Warning: Average cell count less than 5, LR ChiSquare suspect.

# MC1R Promotor

g.536482G>A

## Contingency Analysis of Population Colors By Genotypes

### Mosaic Plot

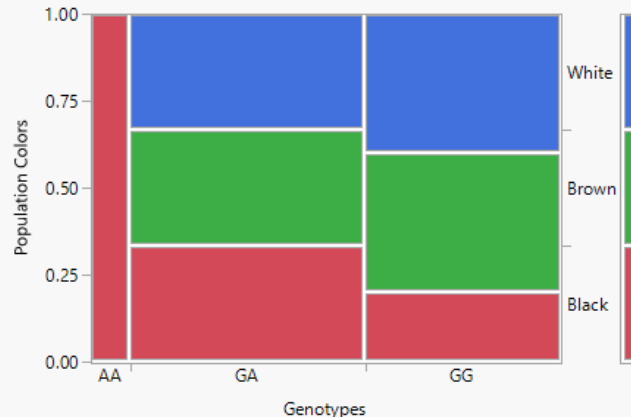

### Contingency Table

| Population Colors |       |        |       |       |       |
|-------------------|-------|--------|-------|-------|-------|
| Count             | Black | Brown  | White | Total |       |
| Total %           |       |        |       |       |       |
| Col %             |       |        |       |       |       |
| Row %             |       |        |       |       |       |
| Genotypes         | AA    | 1      | 0     | 0     | 1     |
|                   |       | 8.33   | 0.00  | 0.00  | 8.33  |
|                   |       | 25.00  | 0.00  | 0.00  |       |
|                   |       | 100.00 | 0.00  | 0.00  |       |
|                   | GA    | 2      | 2     | 2     | 6     |
|                   |       | 16.67  | 16.67 | 16.67 | 50.00 |
|                   |       | 50.00  | 50.00 | 50.00 |       |
|                   |       | 33.33  | 33.33 | 33.33 |       |
|                   | GG    | 1      | 2     | 2     | 5     |
|                   |       | 8.33   | 16.67 | 16.67 | 41.67 |
|                   |       | 25.00  | 50.00 | 50.00 |       |
|                   |       | 20.00  | 40.00 | 40.00 |       |
| Total             | 4     | 4      | 4     | 12    |       |
|                   | 33.33 | 33.33  | 33.33 |       |       |

### Tests

| N  | DF | -LogLike  | RSquare (U) |
|----|----|-----------|-------------|
| 12 | 4  | 1.3170729 | 0.0999      |

| Test             | ChiSquare | Prob>ChiSq |
|------------------|-----------|------------|
| Likelihood Ratio | 2.634     | 0.6208     |
| Pearson          | 2.400     | 0.6626     |

Warning: 20% of cells have expected count less than 5, ChiSquare suspect.

Warning: Average cell count less than 5, LR ChiSquare suspect.

# MC1R Promotor & 5' UTR

g.536623G>A; g.537027G>A; g.537028A>T

3 Variants have identical P-values

## Contingency Analysis of Population Colors By Genotypes

### Mosaic Plot

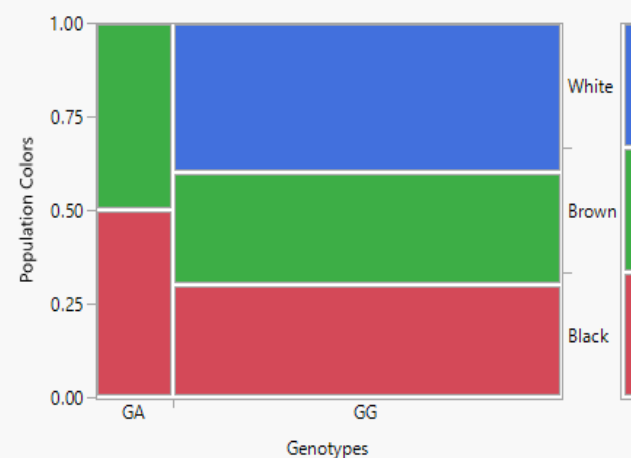

### Contingency Table

| Population Colors |       |       |       |        |       |
|-------------------|-------|-------|-------|--------|-------|
| Count             | Black | Brown | White | Total  |       |
| Total %           |       |       |       |        |       |
| Col %             |       |       |       |        |       |
| Row %             |       |       |       |        |       |
| Genotypes         | GA    | 1     | 1     | 0      |       |
|                   |       | 8.33  | 8.33  | 0.00   | 16.67 |
|                   |       | 25.00 | 25.00 | 0.00   |       |
|                   |       | 50.00 | 50.00 | 0.00   |       |
|                   | GG    | 3     | 3     | 4      | 1     |
|                   |       | 25.00 | 25.00 | 33.33  | 83.33 |
|                   |       | 75.00 | 75.00 | 100.00 |       |
|                   |       | 30.00 | 30.00 | 40.00  |       |
|                   | Total | 4     | 4     | 4      | 1     |
|                   |       | 33.33 | 33.33 | 33.33  |       |

### Tests

| N  | DF | -LogLike   | RSquare (U) |
|----|----|------------|-------------|
| 12 | 2  | 0.90805335 | 0.0689      |

| Test             | ChiSquare | Prob>ChiSq |
|------------------|-----------|------------|
| Likelihood Ratio | 1.816     | 0.4033     |
| Pearson          | 1.200     | 0.5488     |

Warning: 20% of cells have expected count less than 5, ChiSquare suspect.

Warning: Average cell count less than 5, LR ChiSquare suspect.

# MC1R Exon

c.901C>T

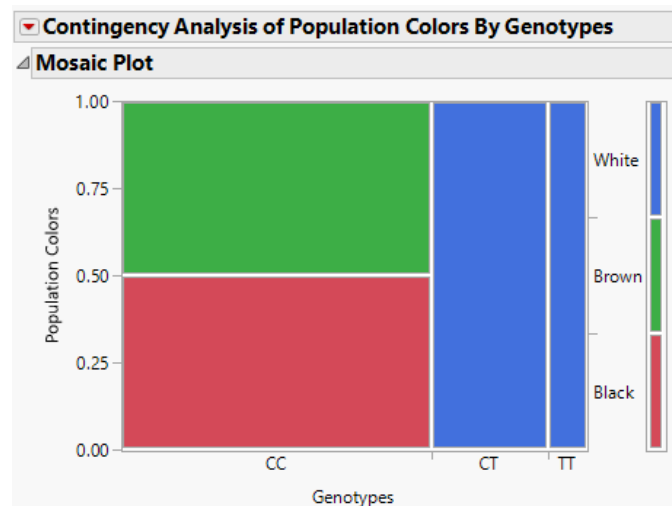

## Contingency Table

|           | Population Colors |        |        |        |
|-----------|-------------------|--------|--------|--------|
|           | Count             | Black  | Brown  | White  |
|           | Total %           |        |        |        |
|           | Col %             |        |        |        |
|           | Row %             |        |        |        |
| Genotypes | CC                | 4      | 4      | 0      |
|           |                   | 33.33  | 33.33  | 0.00   |
|           |                   | 100.00 | 100.00 | 0.00   |
|           |                   | 50.00  | 50.00  | 0.00   |
| CT        |                   | 0      | 0      | 3      |
|           |                   | 0.00   | 0.00   | 25.00  |
|           |                   | 0.00   | 0.00   | 75.00  |
|           |                   | 0.00   | 0.00   | 100.00 |
| TT        |                   | 0      | 0      | 1      |
|           |                   | 0.00   | 0.00   | 8.33   |
|           |                   | 0.00   | 0.00   | 25.00  |
|           |                   | 0.00   | 0.00   | 100.00 |
| Total     |                   | 4      | 4      | 4      |
|           |                   | 33.33  | 33.33  | 33.33  |

## Tests

| N  | DF | -LogLike  | RSquare (U) |
|----|----|-----------|-------------|
| 12 | 4  | 7.6381700 | 0.5794      |

| Test             | ChiSquare | Prob>ChiSq |
|------------------|-----------|------------|
| Likelihood Ratio | 15.276    | 0.0042*    |
| Pearson          | 12.000    | 0.0174*    |

Warning: 20% of cells have expected count less than 5, ChiSquare suspect.  
Warning: Average cell count less than 5, LR ChiSquare suspect.

# MC1R 3' UTR

g.538058G>A

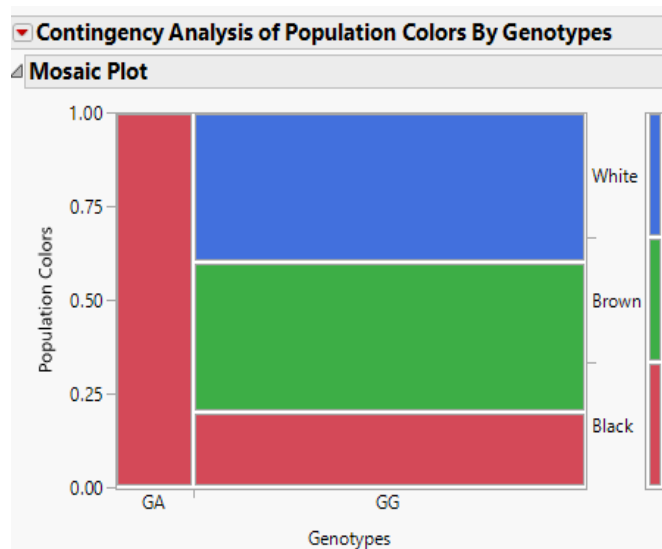

## Contingency Table

|           | Population Colors |        |        |        |
|-----------|-------------------|--------|--------|--------|
|           | Count             | Black  | Brown  | White  |
|           | Total %           |        |        |        |
|           | Col %             |        |        |        |
|           | Row %             |        |        |        |
| Genotypes | GA                | 2      | 0      | 0      |
|           |                   | 16.67  | 0.00   | 0.00   |
|           |                   | 50.00  | 0.00   | 0.00   |
|           |                   | 100.00 | 0.00   | 0.00   |
| GG        |                   | 2      | 4      | 4      |
|           |                   | 16.67  | 33.33  | 33.33  |
|           |                   | 50.00  | 100.00 | 100.00 |
|           |                   | 20.00  | 40.00  | 40.00  |
| Total     |                   | 4      | 4      | 4      |
|           |                   | 33.33  | 33.33  | 33.33  |

## Tests

| N  | DF | -LogLike  | RSquare (U) |
|----|----|-----------|-------------|
| 12 | 2  | 2.6341458 | 0.1998      |

| Test             | ChiSquare | Prob>ChiSq |
|------------------|-----------|------------|
| Likelihood Ratio | 5.268     | 0.0718     |
| Pearson          | 4.800     | 0.0907     |

Warning: 20% of cells have expected count less than 5, ChiSquare suspect.  
Warning: Average cell count less than 5, LR ChiSquare suspect.

# ASIP Exon 2

c.23T\_del; c.25A>G

\*2 Variants have identical P-values

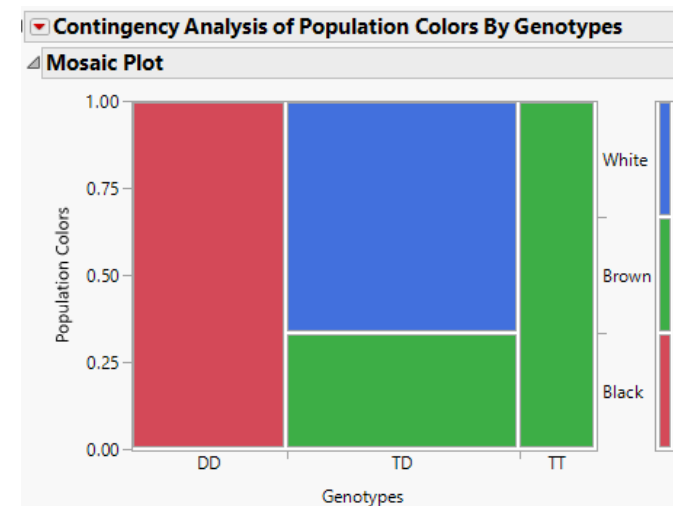

## Contingency Table

|           | Population Colors |        |        |        |
|-----------|-------------------|--------|--------|--------|
|           | Count             | Black  | Brown  | White  |
|           | Total %           |        |        |        |
|           | Col %             |        |        |        |
|           | Row %             |        |        |        |
| Genotypes | DD                | 4      | 0      | 0      |
|           |                   | 33.33  | 0.00   | 0.00   |
|           |                   | 100.00 | 0.00   | 0.00   |
|           |                   | 100.00 | 0.00   | 0.00   |
| TD        |                   | 0      | 2      | 4      |
|           |                   | 0.00   | 16.67  | 33.33  |
|           |                   | 0.00   | 50.00  | 100.00 |
|           |                   | 0.00   | 33.33  | 66.67  |
| TT        |                   | 0      | 2      | 0      |
|           |                   | 0.00   | 16.67  | 0.00   |
|           |                   | 0.00   | 50.00  | 0.00   |
|           |                   | 0.00   | 100.00 | 0.00   |
| Total     |                   | 4      | 4      | 4      |
|           |                   | 33.33  | 33.33  | 33.33  |

## Tests

| N  | DF | -LogLike  | RSquare (U) |
|----|----|-----------|-------------|
| 12 | 4  | 9.3642625 | 0.7103      |

| Test             | ChiSquare | Prob>ChiSq |
|------------------|-----------|------------|
| Likelihood Ratio | 18.729    | 0.0009*    |
| Pearson          | 16.000    | 0.0030*    |

Warning: 20% of cells have expected count less than 5, ChiSquare suspect.  
Warning: Average cell count less than 5, LR ChiSquare suspect.

# ASIP Exon 4

g.178388C\_del

## Contingency Analysis of Population Colors By Genotypes

### Mosaic Plot

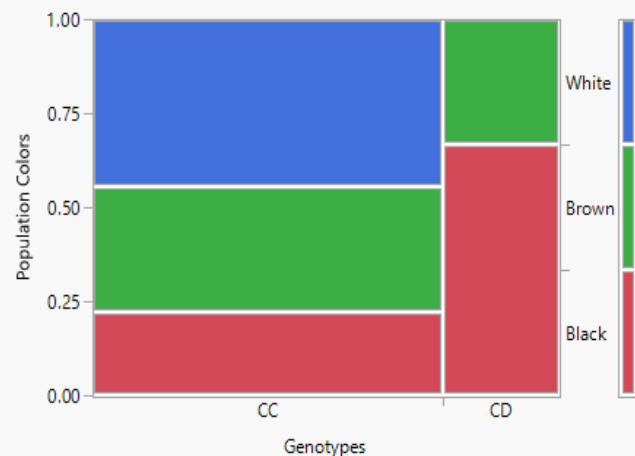

### Contingency Table

|           |         | Population Colors |        |       |       |
|-----------|---------|-------------------|--------|-------|-------|
| Genotypes | Count   | Black             | Brown  | White | Total |
|           | Total % |                   |        |       |       |
|           | Col %   |                   |        |       |       |
|           | Row %   |                   |        |       |       |
|           |         |                   |        |       |       |
| CC        | 2       | 3                 | 4      | 9     |       |
|           | 16.67   | 25.00             | 33.33  | 75.00 |       |
|           | 50.00   | 75.00             | 100.00 |       |       |
|           | 22.22   | 33.33             | 44.44  |       |       |
| CD        | 2       | 1                 | 0      | 3     |       |
|           | 16.67   | 8.33              | 0.00   | 25.00 |       |
|           | 50.00   | 25.00             | 0.00   |       |       |
|           | 66.67   | 33.33             | 0.00   |       |       |
| Total     | 4       | 4                 | 4      | 12    |       |
|           | 33.33   | 33.33             | 33.33  |       |       |

### Tests

| N  | DF | -LogLike  | RSquare (U) |
|----|----|-----------|-------------|
| 12 | 2  | 1.7260924 | 0.1309      |

| Test             | ChiSquare | Prob>ChiSq |
|------------------|-----------|------------|
| Likelihood Ratio | 3.452     | 0.1780     |
| Pearson          | 2.667     | 0.2636     |

Warning: 20% of cells have expected count less than 5, ChiSquare suspect.  
Warning: Average cell count less than 5, LR ChiSquare suspect.

# TYRP1 Intron 1

g.6544484G>A

## Contingency Analysis of Population Colors By Genotypes

### Mosaic Plot

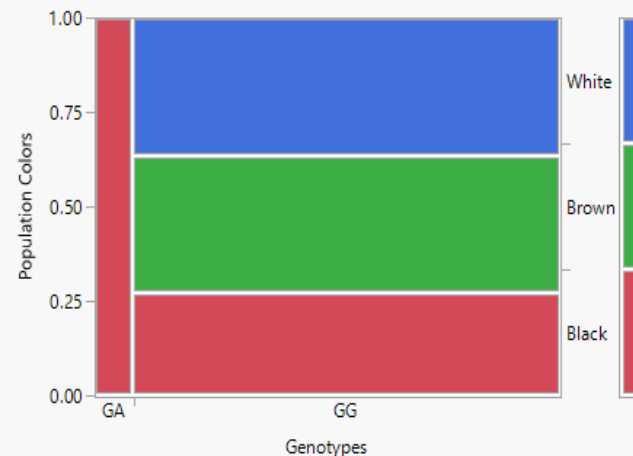

### Contingency Table

|           |         | Population Colors |        |       |       |
|-----------|---------|-------------------|--------|-------|-------|
|           | Count   | Black             | Brown  | White | Total |
| Genotypes | Total % |                   |        |       |       |
|           | Col %   |                   |        |       |       |
|           | Row %   |                   |        |       |       |
|           | GA      | 1                 | 0      | 0     | 1     |
|           | 8.33    | 0.00              | 0.00   | 8.33  |       |
|           | 25.00   | 0.00              | 0.00   |       |       |
|           | 100.00  | 0.00              | 0.00   |       |       |
|           | GG      | 3                 | 4      | 4     | 11    |
|           | 25.00   | 33.33             | 33.33  | 91.67 |       |
|           | 75.00   | 100.00            | 100.00 |       |       |
| 27.27     | 36.36   | 36.36             |        |       |       |
| Total     | 4       | 4                 | 4      | 12    |       |
|           | 33.33   | 33.33             | 33.33  |       |       |

### Tests

| N  | DF | -LogLike  | RSquare (U) |
|----|----|-----------|-------------|
| 12 | 2  | 1.1926912 | 0.0905      |

| Test             | ChiSquare | Prob>ChiSq |
|------------------|-----------|------------|
| Likelihood Ratio | 2.385     | 0.3034     |
| Pearson          | 2.182     | 0.3359     |

Warning: 20% of cells have expected count less than 5, ChiSquare suspect.  
Warning: Average cell count less than 5, LR ChiSquare suspect.

# TYRP1 Intron 2

g.6544049T>C

## Contingency Analysis of Population Colors By Genotypes

### Mosaic Plot

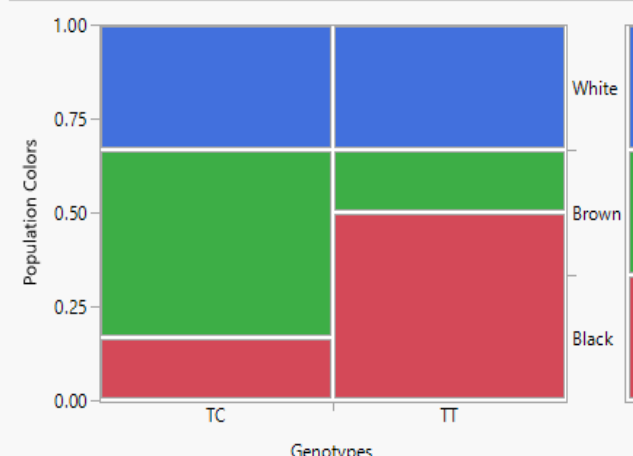

### Contingency Table

|           |         | Population Colors |       |       |       |
|-----------|---------|-------------------|-------|-------|-------|
| Genotypes | Count   | Black             | Brown | White | Total |
|           | Total % |                   |       |       |       |
|           | Col %   |                   |       |       |       |
|           | Row %   |                   |       |       |       |
|           |         |                   |       |       |       |
| TC        | 1       | 3                 | 2     |       |       |
|           | 8.33    | 25.00             | 16.67 | 50.00 |       |
|           | 25.00   | 75.00             | 50.00 |       |       |
|           | 16.67   | 50.00             | 33.33 |       |       |
| TT        | 3       | 1                 | 2     |       |       |
|           | 25.00   | 8.33              | 16.67 | 50.00 |       |
|           | 75.00   | 25.00             | 50.00 |       |       |
|           | 50.00   | 16.67             | 33.33 |       |       |
| Total     | 4       | 4                 | 4     | 1     |       |
|           | 33.33   | 33.33             | 33.33 |       |       |

### Tests

| N  | DF | -LogLike  | RSquare (U) |
|----|----|-----------|-------------|
| 12 | 2  | 1.0464963 | 0.0794      |

| Test             | ChiSquare | Prob>ChiSq |
|------------------|-----------|------------|
| Likelihood Ratio | 2.093     | 0.3512     |
| Pearson          | 2.000     | 0.3679     |

Warning: 20% of cells have expected count less than 5, ChiSquare suspect.  
Warning: Average cell count less than 5, LR ChiSquare suspect.

# TYRP1 Intron 3

g.65372260\_g.65372261insCA

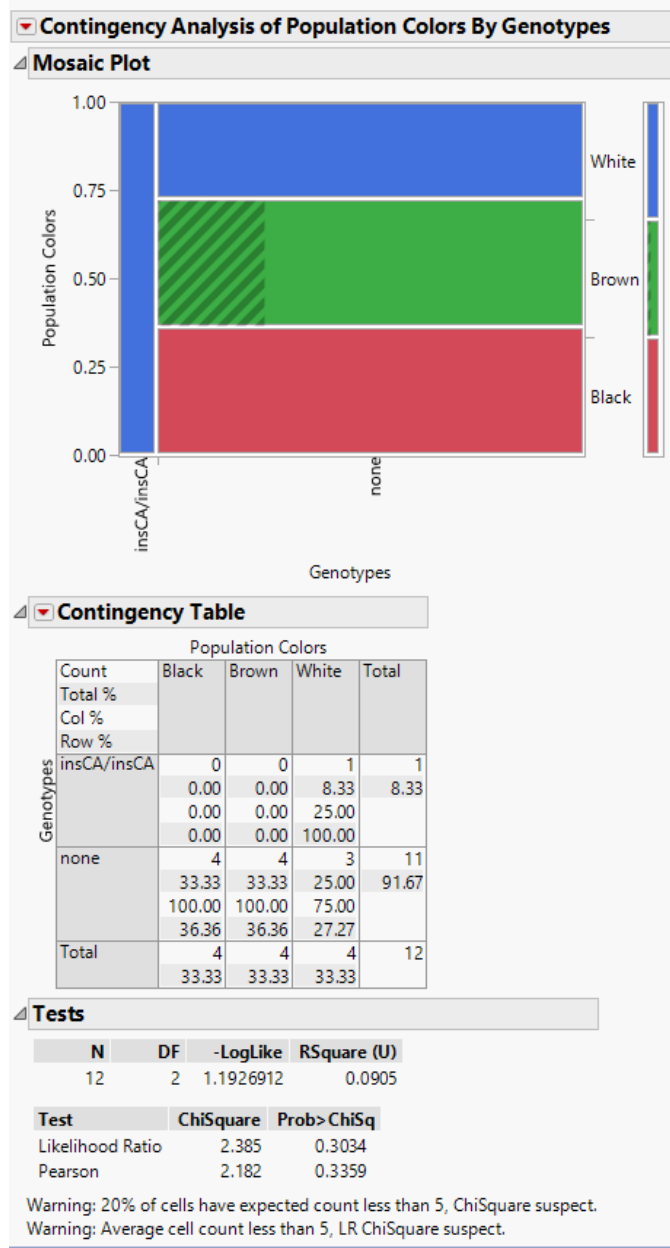

# TYRP1 Intron 4

g.6537183T>C

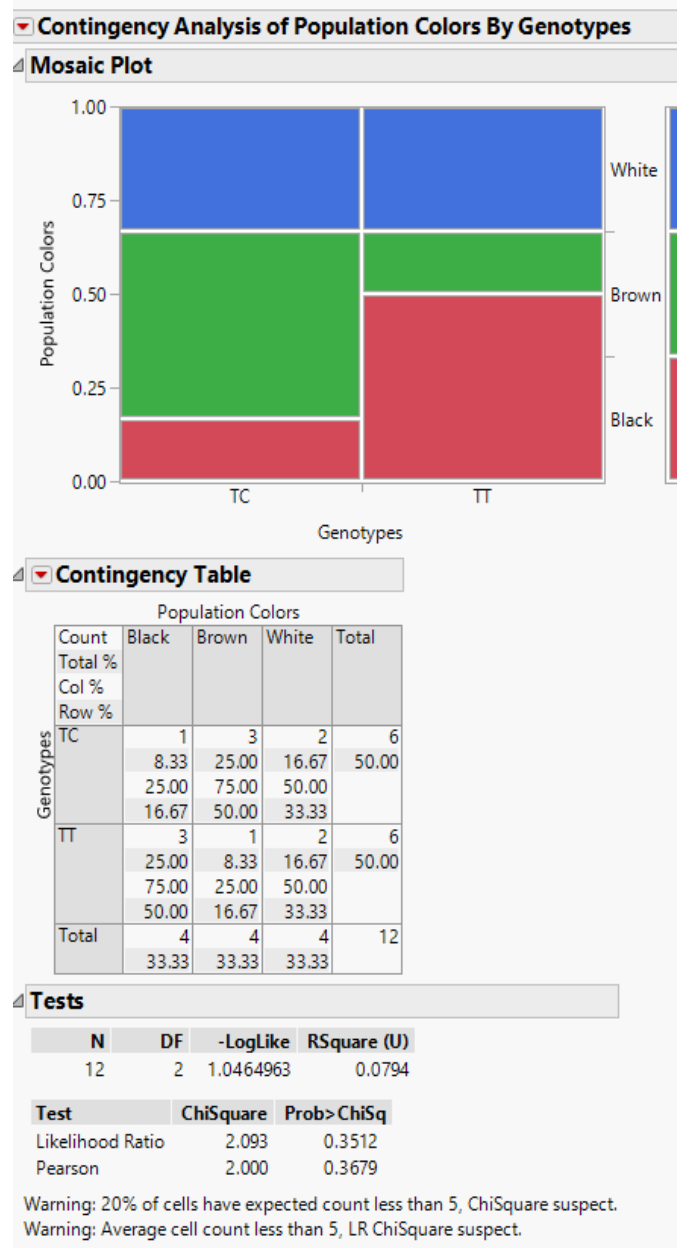

# TYRP1 3'UTR

g.6529345A>T

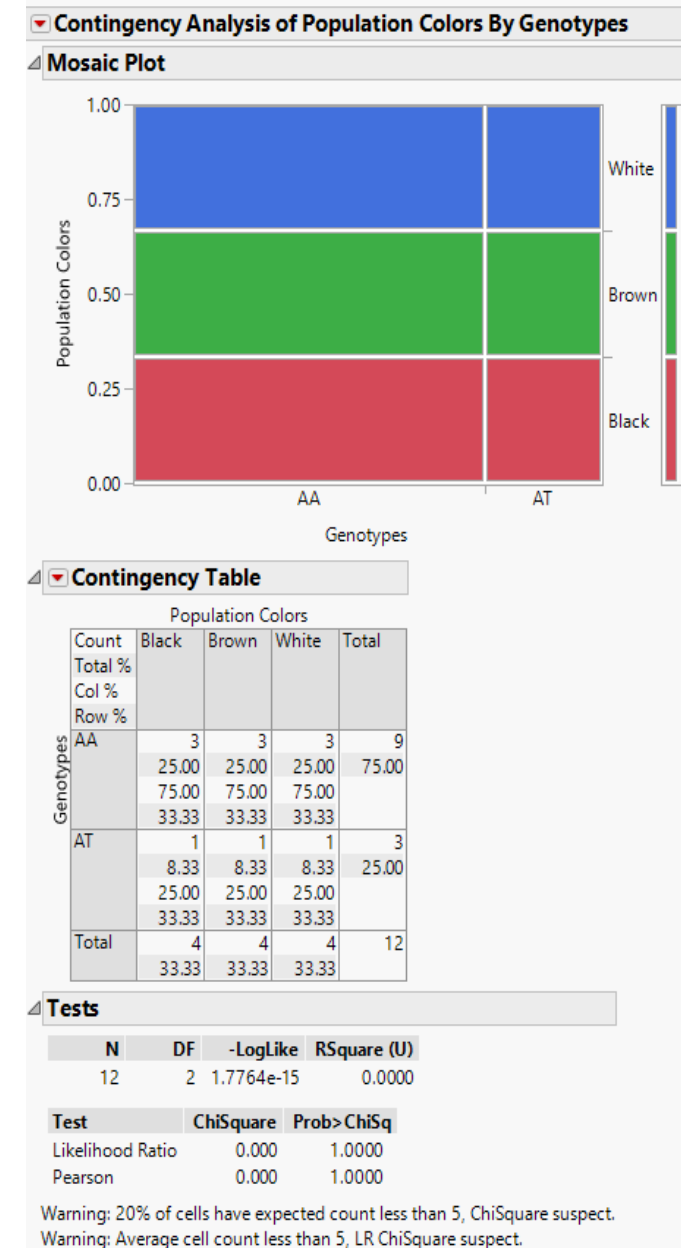

Supplement: Data_Sheet_1.PDF [file Data_Sheet_1.PDF]
